# Supplementary material for: Development of [89Zr]Zr-hCD103.Fab01A and [68Ga]Ga-hCD103.Fab01A for PET imaging to noninvasively assess cancer reactive T cell infiltration: Fab-based CD103 immunoPET
Source: Springer Nature journal article supplement (doi:10.1186/s13550-023-01043-9), 2023-11-20
Supplement: MOESM1 [file 26333262]

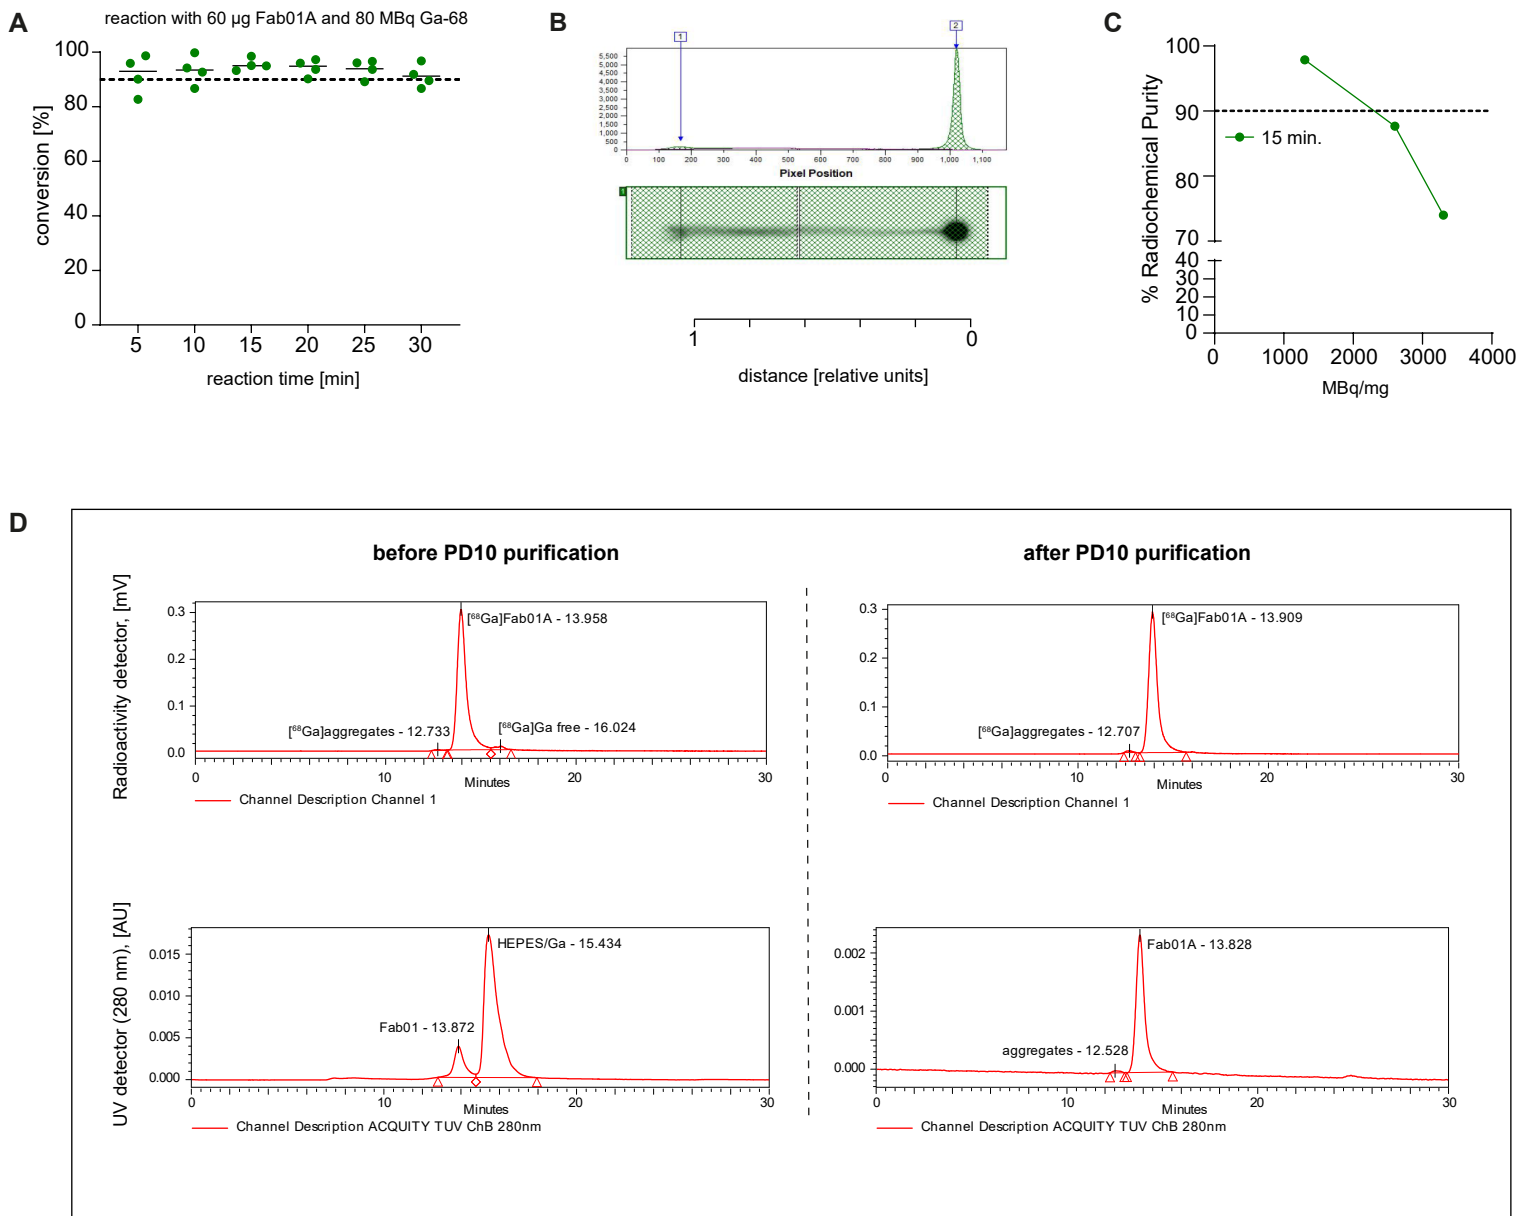

### Supplementary Figure 1. Tracer labeling

A) Optimization with different time points was assessed by instant thin-layer chromatography, where retardation factor of radiolabeled Fab fragment is 0.0 and complexed 68Ga is 1.0

B) In the same manner was assessed amount of activity needed to achieve RCP >90%.

C-D) Purity and characterization of radiolabeled Fab fragment was done with SE-UPLC chromatograms using UV detection at 280 nm (protein) and radioactivity detector

Left panel shows chromatograms of unpurified reaction mixtures (Fab, 68GaCl and HEPES) and right panel – purified Fab by miniPD10 desalting column

**E**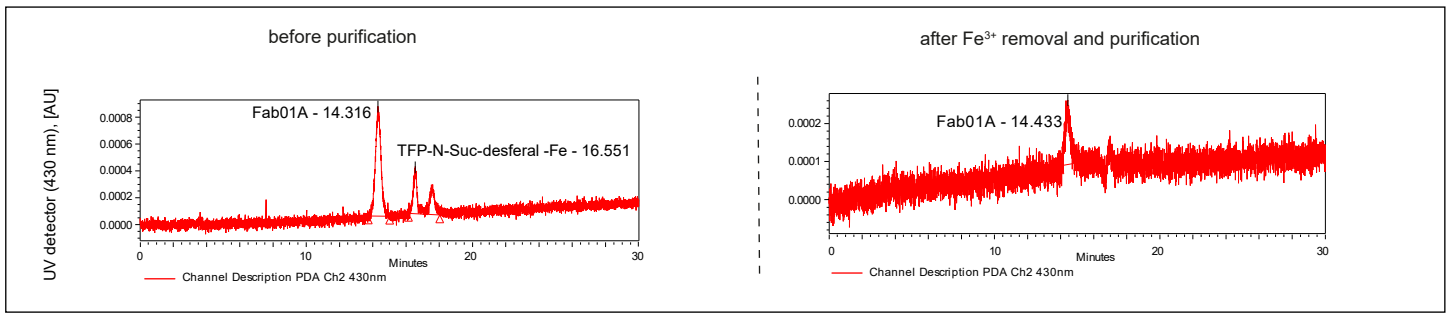**F**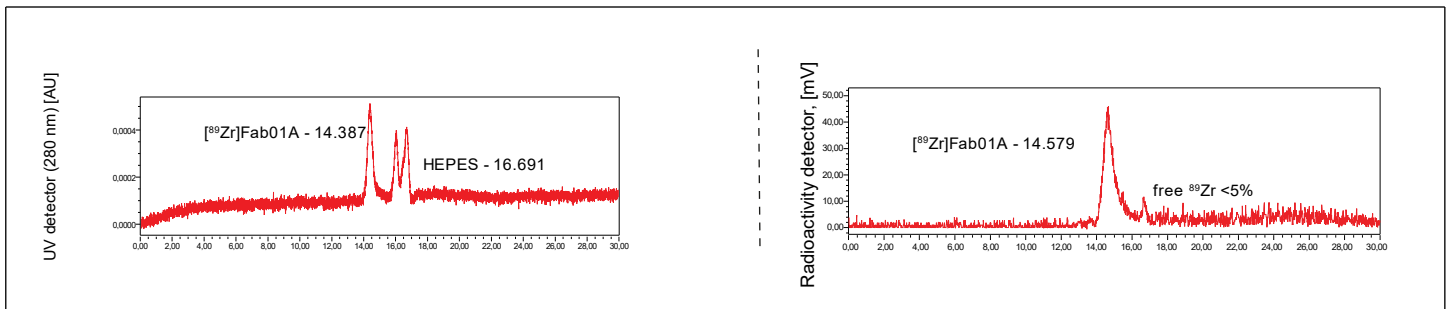

### Supplementary Figure 1. Tracer labeling

E) SE-UPLC chromatograms of hCD103.Fab01A conjugated with the chelator TFP-N-Suc-desferal-Fe using UV detection at 430 nm ( $\text{Fe}^{3+}$ ).

F) SE-UPLC chromatograms of [ $^{89}\text{Zr}$ ]Zr-hCD103.Fab01A using UV detection at 280 nm (protein) at 280 nm and radioactivity detector
