# Supplementary material for: Development of [89Zr]Zr-hCD103.Fab01A and [68Ga]Ga-hCD103.Fab01A for PET imaging to noninvasively assess cancer reactive T cell infiltration: Fab-based CD103 immunoPET
Source: Springer Nature journal article supplement (doi:10.1186/s13550-023-01043-9), 2023-11-20
Supplement: MOESM2 [file 26333262]

## Supplementary Figure 2

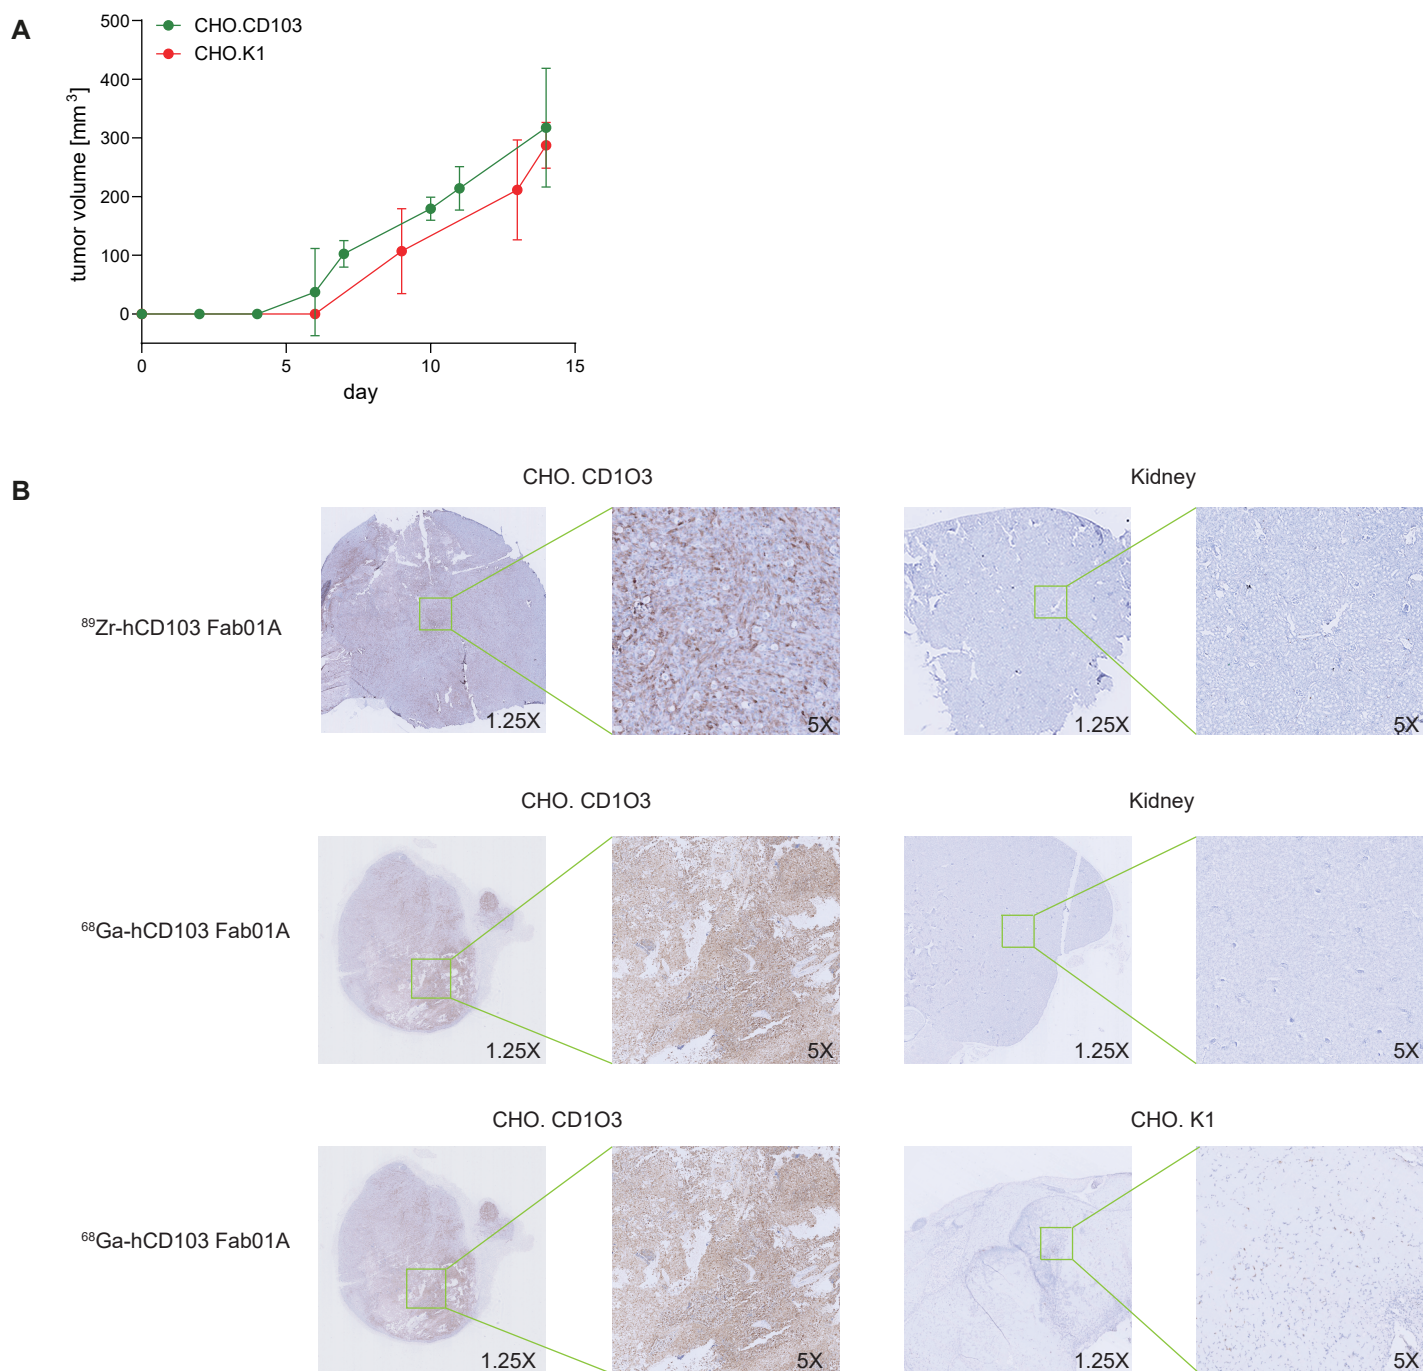

Supplementary Figure 2. In vivo properties of CHO.CD103 and CHO.K1 cell lines.

A) Representative in vivo growth curves of CHO.CD103 (n=6) and CHO.K1 (n=4).

B) Representative ex vivo immunohistochemistry staining of CHO.CD103, CHO.K1 xenografts and kidney.
