# Supplementary material for: Development of [89Zr]Zr-hCD103.Fab01A and [68Ga]Ga-hCD103.Fab01A for PET imaging to noninvasively assess cancer reactive T cell infiltration: Fab-based CD103 immunoPET
Source: Springer Nature journal article supplement (doi:10.1186/s13550-023-01043-9), 2023-11-20

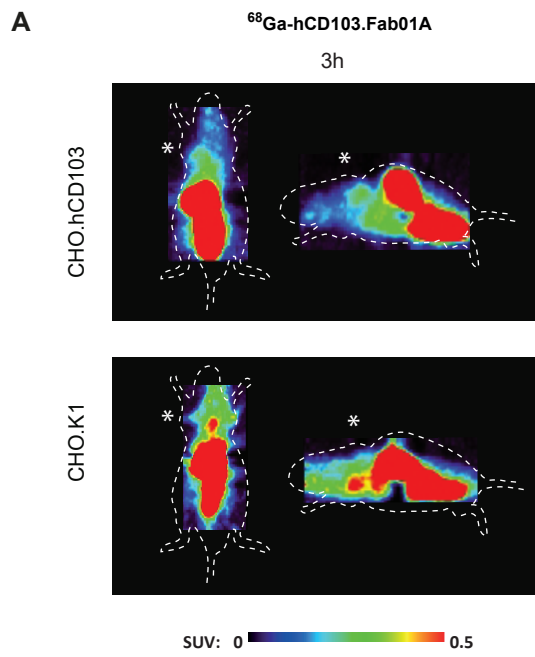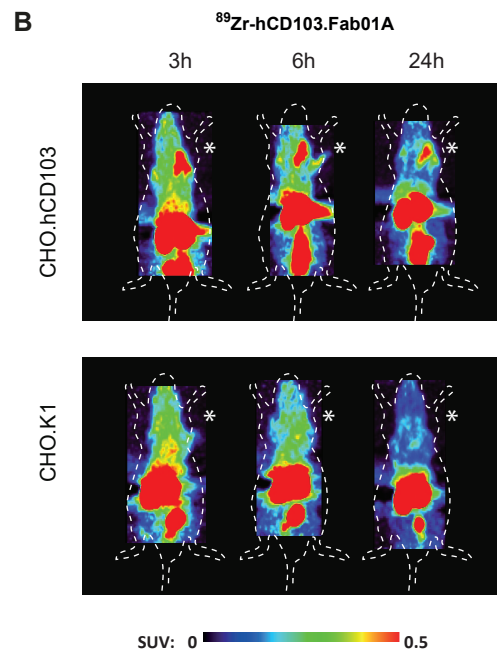

Supplement: MOESM3 [file 26333262]
